# Supplementary material for: Progesterone depletion results in Lamin B1 loss and induction of cell death in mouse trophoblast giant cells
Source: PLOS journal article supplement (doi:10.1371/journal.pone.0254674), 2021-07-14
Supplement: S7 (10.1371/journal.pone.0254674.s007) [file journal.pone.0254674.s007]

Fig3B raw images

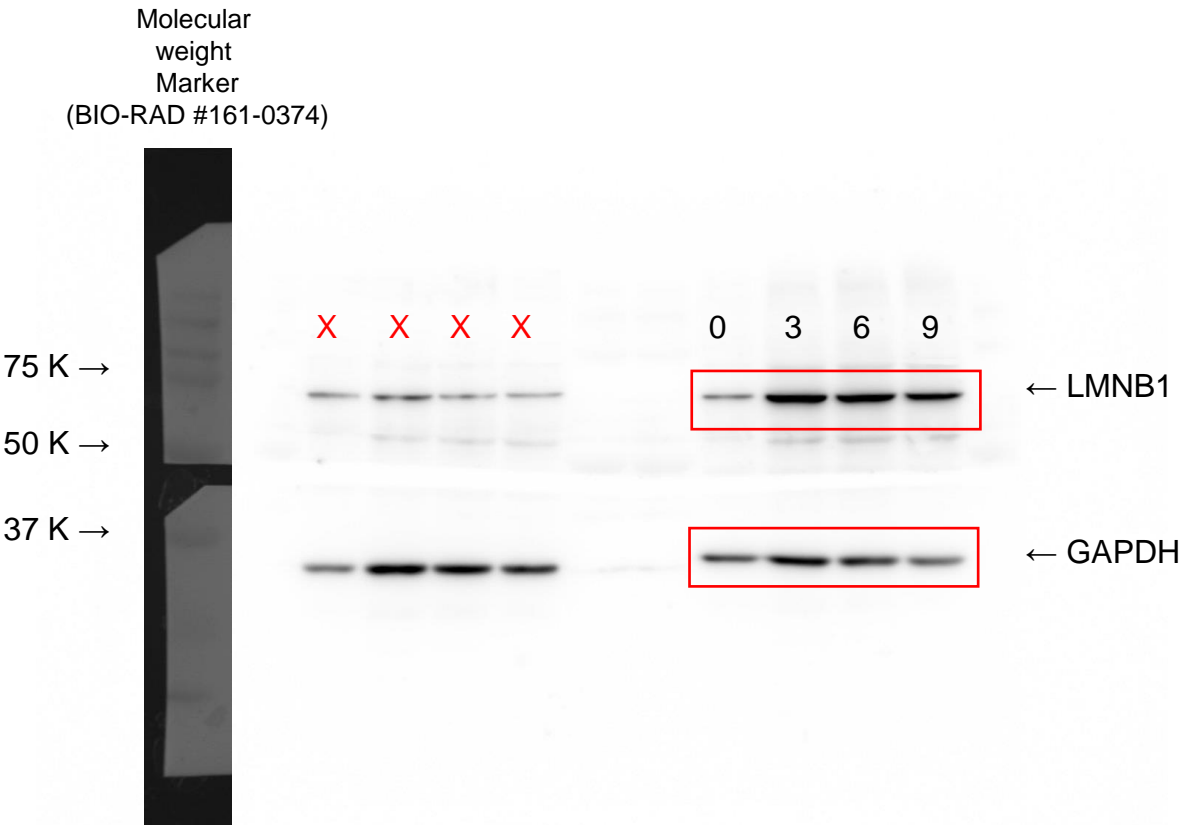

PVDF membrane was cut and images were captured at same time by LAS-3000.  
Exposure time: 45sec

Fig4A raw images

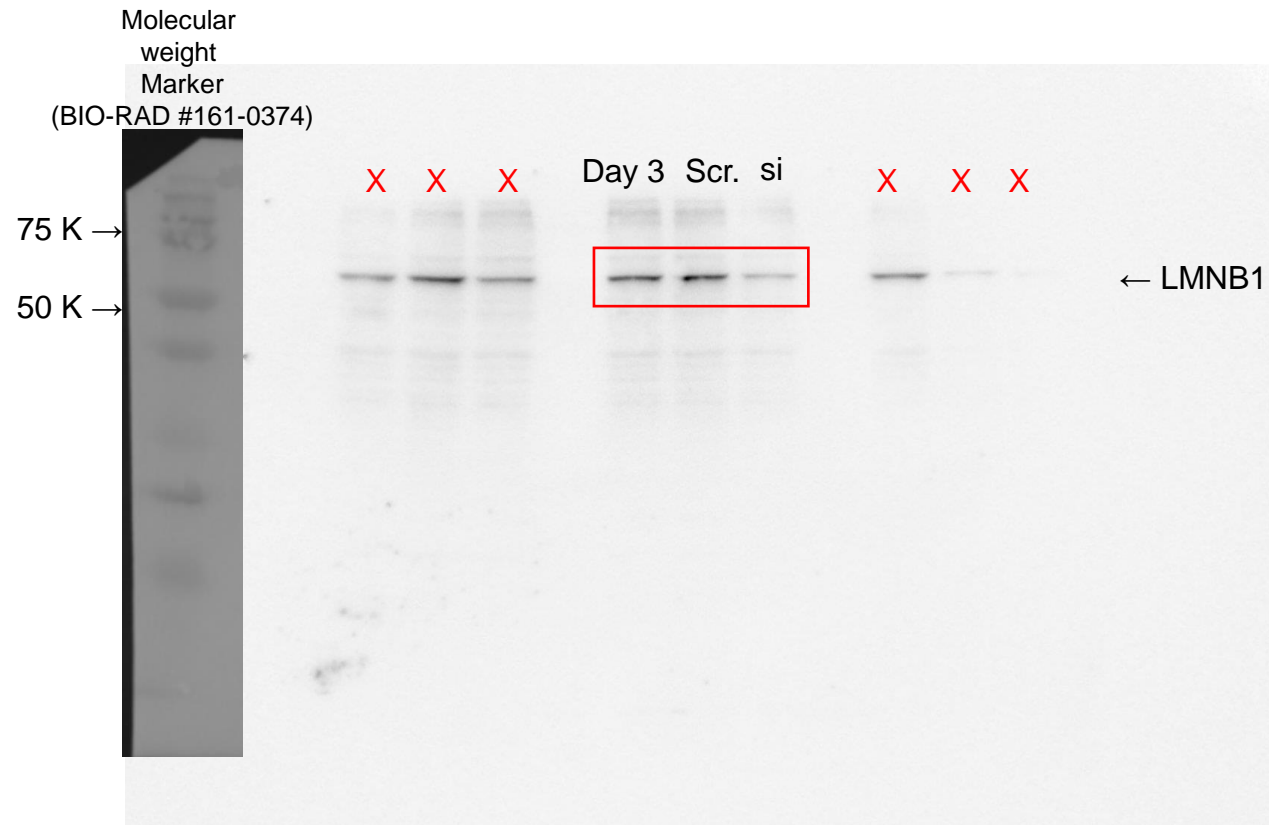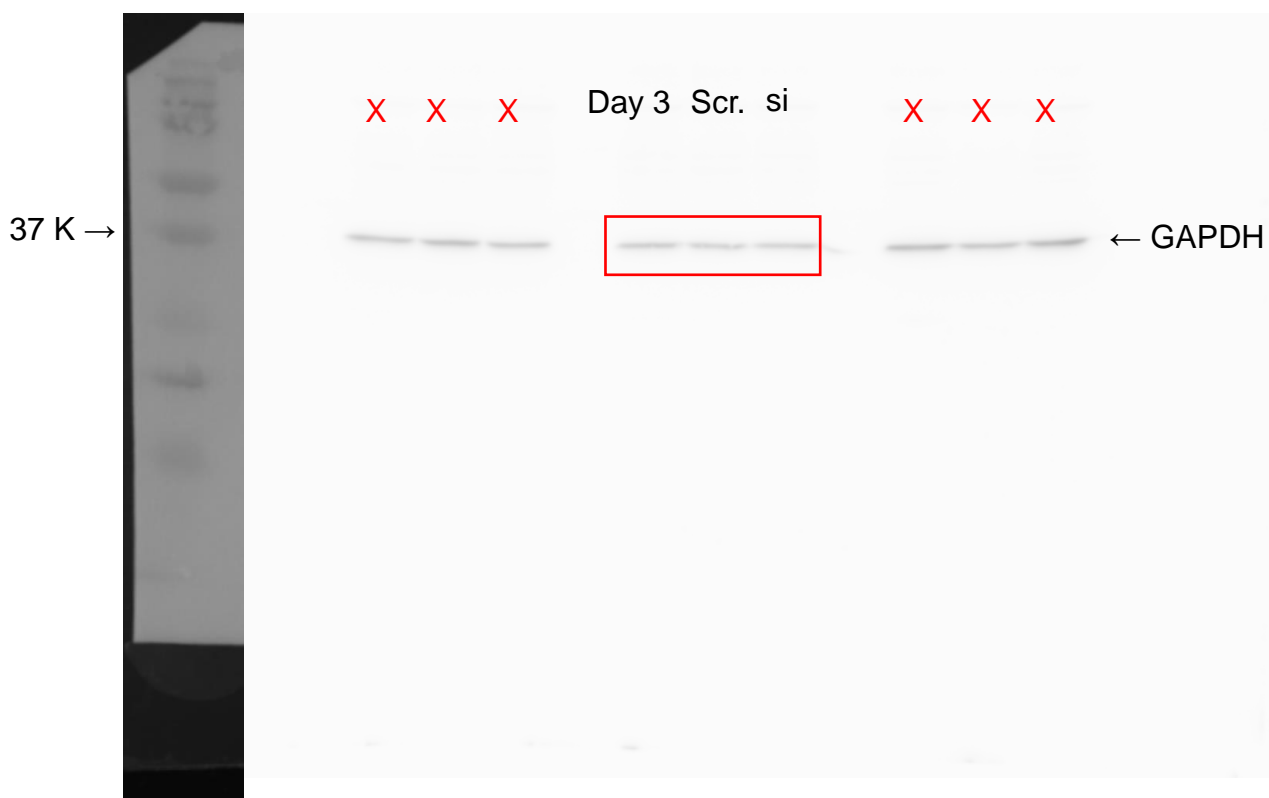

Images were captured by LAS-3000. Exposure time :45sec (LMNB1), 30sec (GAPDH)  
Molecular weight marker image was captured only one time at GAPDH detection timing.  
Blot images were same membrane.

S6 Fig raw images

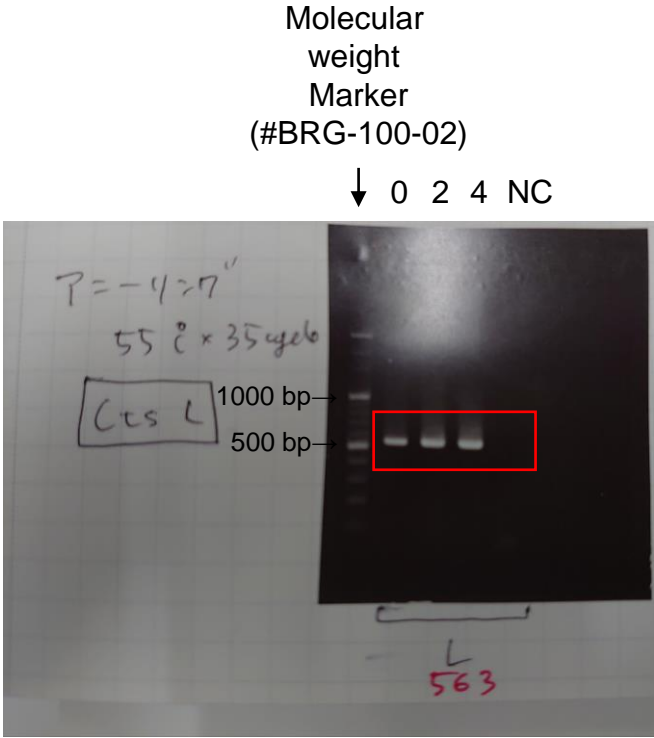

Samples were stained by ethidium bromide.  
Image was captured by Gel DOC IT-TS (UVP).

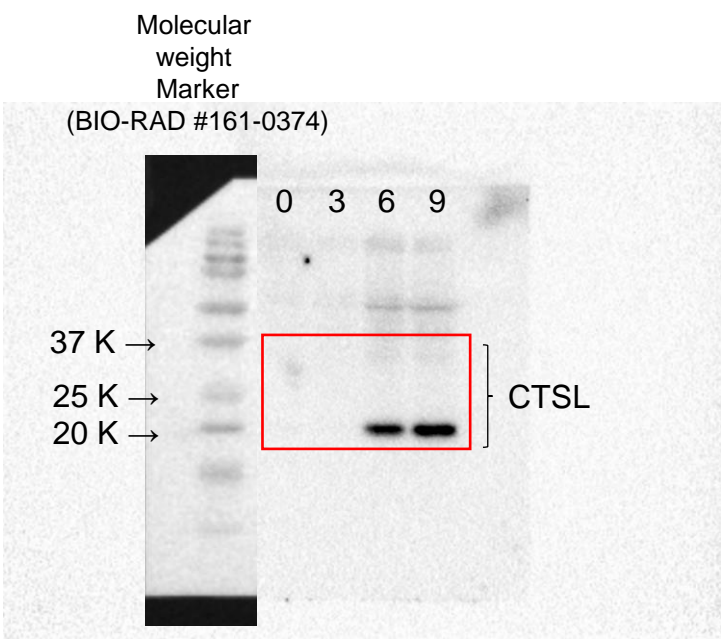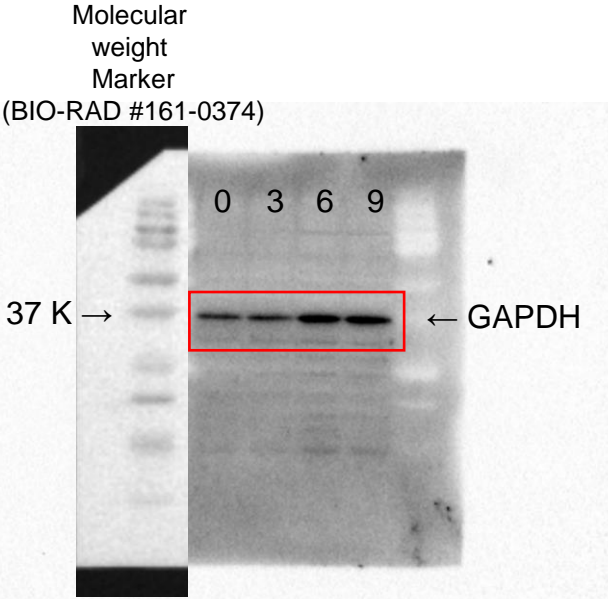

Images were captured by Chemi Doc XRS+ imaging system (BIO-RAD). Exposure time : 5sec (LMNB1), 15sec (GAPDH)  
Molecular weight marker image was captured only one time at CTSL detection timing.  
Blot images were same membrane.
